# Supplementary material
Source: PubMed Central journal article supplement (PMC6980687)
Supplement: NIHMS1544572-supplement-1.pdf [file NIHMS1544572-supplement-1.pdf]

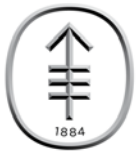

Memorial Sloan Kettering  
Cancer Center

# PREVALANCE OF SELF REPORTED LYMPHEDEMA IN PATIENTS WITH ENDOMETRIAL CANCER

Principal Investigator:

Mario Leitao, MD

Department of Surgery

1275 York Ave.

New York, NY 10065

212-639-3987

NAME:

DATE COMPLETED:

---

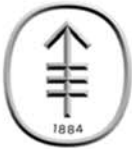

**INSTRUCTIONS: PLEASE CHECK THE APPROPRIATE BOX OR FILL IN THE BLANK AS INDICATED.**

**ABOUT YOU**

This first set of questions is about you and your treatment for endometrial cancer.

**1. About how tall are you without shoes?**

\_\_\_\_\_ Feet    \_\_\_ \_\_\_ Inches

**2. About how much do you weigh without shoes?**

\_\_\_ \_\_\_ \_\_\_ Pounds

**3. Did you receive radiation treatment after your surgery for endometrial cancer?**

No       Yes       Don't know

**4. Did you receive chemotherapy after your surgery for endometrial cancer?**

No       Yes       Don't know

**5. Has a doctor, nurse, or other health professional ever told you that you have any of the following? (Mark one response on each line.)**

|                                                | NO                       | YES                      | DON'T KNOW               |
|------------------------------------------------|--------------------------|--------------------------|--------------------------|
|                                                | ▼                        | ▼                        | ▼                        |
| Diabetes or high blood sugar.....              | <input type="checkbox"/> | <input type="checkbox"/> | <input type="checkbox"/> |
| Heart failure or congestive heart failure..... | <input type="checkbox"/> | <input type="checkbox"/> | <input type="checkbox"/> |
| Kidney disease or kidney failure.....          | <input type="checkbox"/> | <input type="checkbox"/> | <input type="checkbox"/> |

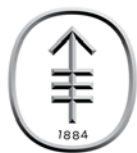

Memorial Sloan Kettering  
Cancer Center

**6. Has a doctor, nurse, or other health professional told you that your endometrial cancer has recurred?**

No       Yes       Don't know

If Yes, when? \_\_\_\_ / \_\_\_\_

Month / Year

**Lymphedema is swelling that can occur anywhere on a person's body. The swelling occurs when lymph fluid cannot drain properly because the lymphatic system is blocked or damaged.**

The next few questions ask about lymphedema in your lower body, which includes anything below the navel (belly button).

**7. Before your surgery, did a doctor, nurse, or other health professional talk to you about the possibility of developing lymphedema in your lower body as a result of your surgery for endometrial cancer?**

No       Yes       Don't know

**8. Has a doctor, nurse, or other health professional ever told you that you have lymphedema in your lower body?**

No       Yes       Don't know

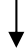

If Yes, when were you first told that you have lymphedema in your lower body?

Before your surgery for endometrial cancer

After your surgery for endometrial cancer

Don't know



Memorial Sloan Kettering  
Cancer Center

**Have you ever done any of the following to manage lymphedema in your lower body?**

|                                                                  | NO<br>▼                  | YES<br>▼                 | <b>If yes, are you still doing this?</b> |                          |
|------------------------------------------------------------------|--------------------------|--------------------------|------------------------------------------|--------------------------|
|                                                                  |                          |                          | NO<br>▼                                  | YES<br>▼                 |
| Worn compression stockings.....                                  | <input type="checkbox"/> | <input type="checkbox"/> | <input type="checkbox"/>                 | <input type="checkbox"/> |
| Worn bandages.....                                               | <input type="checkbox"/> | <input type="checkbox"/> | <input type="checkbox"/>                 | <input type="checkbox"/> |
| Done exercises such as “calf pumps”                              | <input type="checkbox"/> | <input type="checkbox"/> | <input type="checkbox"/>                 | <input type="checkbox"/> |
| Done self-massage, also called “manual lymphatic drainage” ..... | <input type="checkbox"/> | <input type="checkbox"/> | <input type="checkbox"/>                 | <input type="checkbox"/> |
| Other, please specify:<br>_____                                  | <input type="checkbox"/> | <input type="checkbox"/> | <input type="checkbox"/>                 | <input type="checkbox"/> |

## **YOUR LOWER BODY**

The following statements are about sensations you may have on one or both sides of your lower body.

Please mark one box for each statement that best describes how your lower body felt on average in the past 4 weeks. If you have one of these sensations on both sides of your lower body, describe the side that seems to be affected the most.

|                                                                            | Not<br>at all<br>▼       | A Little<br>bit<br>▼     | Somewhat<br>▼            | Quite<br>a bit<br>▼      | Very<br>much<br>▼        |
|----------------------------------------------------------------------------|--------------------------|--------------------------|--------------------------|--------------------------|--------------------------|
| 9. The skin on my leg feels tight.....                                     | <input type="checkbox"/> |
| 10. The skin above my ankle feels tight.....                               | <input type="checkbox"/> |
| 11. My leg feels heavy.....                                                | <input type="checkbox"/> |
| 12. I have pain or discomfort in my leg.....                               | <input type="checkbox"/> |
| 13. My leg is noticeably smaller when I get out of bed in the morning..... | <input type="checkbox"/> |

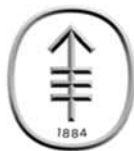

Memorial Sloan Kettering  
Cancer Center

- 14. I have swelling in my foot.....
- 15. I have swelling around my ankle.....
- 16. I have swelling in my lower leg (including knee).....
- 17. I have swelling in my upper leg.....
- 18. I have swelling in my buttocks.....
- 19. I have swelling in my hip (on the side below the waist).....
- 20. I have swelling below my stomach (below the belly button).....
- 21. I have swelling in my genital area.....

**YOUR WELL-BEING**

We are interested in some things about you and your health. Please answer all of the questions yourself by marking the box that best applies to you. There is no “right” or “wrong” answer. The information that you provide will remain strictly confidential.

- |                                                                                                             | Not<br>at all            | A Little<br>bit          | Quite<br>a bit           | Very<br>much             |
|-------------------------------------------------------------------------------------------------------------|--------------------------|--------------------------|--------------------------|--------------------------|
|                                                                                                             | ▼                        | ▼                        | ▼                        | ▼                        |
| 22. Do you have any trouble doing strenuous activities like carrying a heavy shopping bag or suitcase?..... | <input type="checkbox"/> | <input type="checkbox"/> | <input type="checkbox"/> | <input type="checkbox"/> |
| 23. Do you have any trouble taking a long walk?.....                                                        | <input type="checkbox"/> | <input type="checkbox"/> | <input type="checkbox"/> | <input type="checkbox"/> |
| 24. Do you have any trouble taking a short walk outside of the house?.....                                  | <input type="checkbox"/> | <input type="checkbox"/> | <input type="checkbox"/> | <input type="checkbox"/> |

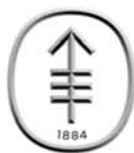

Memorial Sloan Kettering  
Cancer Center

25. Do you need to stay in bed or a chair during the day?.....
26. Do you need help with eating, dressing, washing yourself or using the toilet?.....

**During the past week:**

- |                                                                                      | Not<br>at all<br>▼       | A Little<br>bit<br>▼     | Quite<br>a bit<br>▼      | Very<br>much<br>▼        |
|--------------------------------------------------------------------------------------|--------------------------|--------------------------|--------------------------|--------------------------|
| 27. Were you limited in doing either your work or other daily activities?.....       | <input type="checkbox"/> | <input type="checkbox"/> | <input type="checkbox"/> | <input type="checkbox"/> |
| 28. Were you limited in pursuing your hobbies or other leisure time activities?..... | <input type="checkbox"/> | <input type="checkbox"/> | <input type="checkbox"/> | <input type="checkbox"/> |
| 29. Were you short of breath?.....                                                   | <input type="checkbox"/> | <input type="checkbox"/> | <input type="checkbox"/> | <input type="checkbox"/> |
| 30. Have you had pain?.....                                                          | <input type="checkbox"/> | <input type="checkbox"/> | <input type="checkbox"/> | <input type="checkbox"/> |
| 31. Did you need to rest?.....                                                       | <input type="checkbox"/> | <input type="checkbox"/> | <input type="checkbox"/> | <input type="checkbox"/> |
| 32. Have you had trouble sleeping?.....                                              | <input type="checkbox"/> | <input type="checkbox"/> | <input type="checkbox"/> | <input type="checkbox"/> |
| 33. Have you felt weak?.....                                                         | <input type="checkbox"/> | <input type="checkbox"/> | <input type="checkbox"/> | <input type="checkbox"/> |
| 34. Have you lacked appetite?.....                                                   | <input type="checkbox"/> | <input type="checkbox"/> | <input type="checkbox"/> | <input type="checkbox"/> |
| 35. Have you felt nauseated?.....                                                    | <input type="checkbox"/> | <input type="checkbox"/> | <input type="checkbox"/> | <input type="checkbox"/> |
| 36. Have you vomited?.....                                                           | <input type="checkbox"/> | <input type="checkbox"/> | <input type="checkbox"/> | <input type="checkbox"/> |
| 37. Have you been constipated?.....                                                  | <input type="checkbox"/> | <input type="checkbox"/> | <input type="checkbox"/> | <input type="checkbox"/> |
| 38. Have you had diarrhea?.....                                                      | <input type="checkbox"/> | <input type="checkbox"/> | <input type="checkbox"/> | <input type="checkbox"/> |
| 39. Were you tired?.....                                                             | <input type="checkbox"/> | <input type="checkbox"/> | <input type="checkbox"/> | <input type="checkbox"/> |
| 40. Did pain interfere with your daily activities?.....                              | <input type="checkbox"/> | <input type="checkbox"/> | <input type="checkbox"/> | <input type="checkbox"/> |



Memorial Sloan Kettering  
Cancer Center

**During the past week:**

|                                                                                                              | Not<br>at all<br>▼       | A Little<br>bit<br>▼     | Quite<br>a bit<br>▼      | Very<br>much<br>▼        |
|--------------------------------------------------------------------------------------------------------------|--------------------------|--------------------------|--------------------------|--------------------------|
| 41. Have you had difficulty in concentrating on things like reading a newspaper or watching television?..... | <input type="checkbox"/> | <input type="checkbox"/> | <input type="checkbox"/> | <input type="checkbox"/> |
| 42. Did you feel tense?.....                                                                                 | <input type="checkbox"/> | <input type="checkbox"/> | <input type="checkbox"/> | <input type="checkbox"/> |
| 43. Did you worry?.....                                                                                      | <input type="checkbox"/> | <input type="checkbox"/> | <input type="checkbox"/> | <input type="checkbox"/> |
| 44. Did you feel irritable?.....                                                                             | <input type="checkbox"/> | <input type="checkbox"/> | <input type="checkbox"/> | <input type="checkbox"/> |
| 45. Did you feel depressed?.....                                                                             | <input type="checkbox"/> | <input type="checkbox"/> | <input type="checkbox"/> | <input type="checkbox"/> |
| 46. Have you had difficulty remembering things?.....                                                         | <input type="checkbox"/> | <input type="checkbox"/> | <input type="checkbox"/> | <input type="checkbox"/> |
| 47. Has your physical condition or medical treatment interfered with your <u>family</u> life?.....           | <input type="checkbox"/> | <input type="checkbox"/> | <input type="checkbox"/> | <input type="checkbox"/> |
| 48. Has your physical condition or medical treatment interfered with your <u>social</u> activities?.....     | <input type="checkbox"/> | <input type="checkbox"/> | <input type="checkbox"/> | <input type="checkbox"/> |
| 49. Has your physical condition or medical treatment caused you financial difficulties?.....                 | <input type="checkbox"/> | <input type="checkbox"/> | <input type="checkbox"/> | <input type="checkbox"/> |

For the following items, please mark the number between 1 and 7 that best applies to you.

**50. How would you rate your overall health during the past week?**

                      

1        2        3        4        5        6        7

Very poor

Excellent

**51. How would you rate your overall quality of life during the past week?**

                      

1        2        3        4        5        6        7

Very poor

Excellent

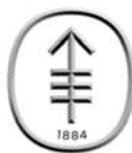

Memorial Sloan Kettering  
Cancer Center

Patients sometimes report that they have the following symptoms or problems. Please indicate the extent to which you have experienced these symptoms or problems.

**During the past week:**

|                                                                                                     | Not<br>at all<br>▼       | A Little<br>bit<br>▼     | Quite<br>a bit<br>▼      | Very<br>much<br>▼        |
|-----------------------------------------------------------------------------------------------------|--------------------------|--------------------------|--------------------------|--------------------------|
| 52. Have you had swelling in one or both legs?.....                                                 | <input type="checkbox"/> | <input type="checkbox"/> | <input type="checkbox"/> | <input type="checkbox"/> |
| 53. Have you felt heaviness in one or both legs?.....                                               | <input type="checkbox"/> | <input type="checkbox"/> | <input type="checkbox"/> | <input type="checkbox"/> |
| 54. Have you had pain in your lower back and/or<br>pelvis?.....                                     | <input type="checkbox"/> | <input type="checkbox"/> | <input type="checkbox"/> | <input type="checkbox"/> |
| 55. When you felt the urge to pass urine, did you have<br>to hurry to get to the toilet?.....       | <input type="checkbox"/> | <input type="checkbox"/> | <input type="checkbox"/> | <input type="checkbox"/> |
| 56. Have you passed urine frequently?.....                                                          | <input type="checkbox"/> | <input type="checkbox"/> | <input type="checkbox"/> | <input type="checkbox"/> |
| 57. Have you had leaking of urine?.....                                                             | <input type="checkbox"/> | <input type="checkbox"/> | <input type="checkbox"/> | <input type="checkbox"/> |
| 58. Have you had pain or a burning feeling when<br>passing urine?.....                              | <input type="checkbox"/> | <input type="checkbox"/> | <input type="checkbox"/> | <input type="checkbox"/> |
| 59. When you felt the urge to move your bowels, did<br>you have to hurry to get to the toilet?..... | <input type="checkbox"/> | <input type="checkbox"/> | <input type="checkbox"/> | <input type="checkbox"/> |
| 60. Have you had any leakage of stools?.....                                                        | <input type="checkbox"/> | <input type="checkbox"/> | <input type="checkbox"/> | <input type="checkbox"/> |
| 61. Have you been troubled by passing wind?.....                                                    | <input type="checkbox"/> | <input type="checkbox"/> | <input type="checkbox"/> | <input type="checkbox"/> |
| 62. Have you had cramps in your abdomen?.....                                                       | <input type="checkbox"/> | <input type="checkbox"/> | <input type="checkbox"/> | <input type="checkbox"/> |
| 63. Have you had a bloated feeling in your abdomen?..                                               | <input type="checkbox"/> | <input type="checkbox"/> | <input type="checkbox"/> | <input type="checkbox"/> |
| 64. Have you had tingling or numbness in your hands<br>or feet?.....                                | <input type="checkbox"/> | <input type="checkbox"/> | <input type="checkbox"/> | <input type="checkbox"/> |
| 65. Have you had aches or pains in your muscles or<br>joints?.....                                  | <input type="checkbox"/> | <input type="checkbox"/> | <input type="checkbox"/> | <input type="checkbox"/> |





Memorial Sloan Kettering  
Cancer Center

**During the past week:**

|                                                                                             | Not<br>at all<br>▼       | A Little<br>bit<br>▼     | Quite<br>a bit<br>▼      | Very<br>much<br>▼        |
|---------------------------------------------------------------------------------------------|--------------------------|--------------------------|--------------------------|--------------------------|
| 66. Have you lost hair?.....                                                                | <input type="checkbox"/> | <input type="checkbox"/> | <input type="checkbox"/> | <input type="checkbox"/> |
| 67. Has food and drink tasted differently from usual?                                       | <input type="checkbox"/> | <input type="checkbox"/> | <input type="checkbox"/> | <input type="checkbox"/> |
| 68. Have you felt physically less attractive as a result of your disease or treatment?..... | <input type="checkbox"/> | <input type="checkbox"/> | <input type="checkbox"/> | <input type="checkbox"/> |
| 69. Have you felt less feminine as a result of your disease or treatment?.....              | <input type="checkbox"/> | <input type="checkbox"/> | <input type="checkbox"/> | <input type="checkbox"/> |

**During the past 4 weeks:**

|                                                     | Not<br>at all<br>▼       | A Little<br>bit<br>▼     | Quite<br>a bit<br>▼      | Very<br>much<br>▼        |
|-----------------------------------------------------|--------------------------|--------------------------|--------------------------|--------------------------|
| 70. To what extent were you interested in sex?..... | <input type="checkbox"/> | <input type="checkbox"/> | <input type="checkbox"/> | <input type="checkbox"/> |
| 71. To what extent were you sexually active?.....   | <input type="checkbox"/> | <input type="checkbox"/> | <input type="checkbox"/> | <input type="checkbox"/> |

Answer these questions only if you have been sexually active during the past 4 weeks:

|                                                                                |                          |                          |                          |                          |
|--------------------------------------------------------------------------------|--------------------------|--------------------------|--------------------------|--------------------------|
| 72. Has your vagina felt dry during sexual activity?.....                      | <input type="checkbox"/> | <input type="checkbox"/> | <input type="checkbox"/> | <input type="checkbox"/> |
| 73. Has your vagina felt short and/or tight?.....                              | <input type="checkbox"/> | <input type="checkbox"/> | <input type="checkbox"/> | <input type="checkbox"/> |
| 74. Have you had pain during sexual intercourse or other sexual activity?..... | <input type="checkbox"/> | <input type="checkbox"/> | <input type="checkbox"/> | <input type="checkbox"/> |
| 75. Was sexual activity enjoyable for you?.....                                | <input type="checkbox"/> | <input type="checkbox"/> | <input type="checkbox"/> | <input type="checkbox"/> |

**THANK YOU!**

Question 1 through 5, 7 - 21: Copyright 2011 Mayo Foundation for Medical Education and Research. All rights reserved  
 Questions 22 through 49: Copyright 1995 EORTC Quality of Life Group. All rights reserved. Version 3.0  
 Questions 50 through 75: Copyright 2010 EORTC Quality of Life Group. All rights reserved.
